# Supplementary material for: Pandemic velocity: Forecasting COVID-19 in the US with a machine learning & Bayesian time series compartmental model
Source: PubMed Central journal article supplement (PMC8031749; doi:10.1371/journal.pcbi.1008837), 2021-03-29
Supplement: pcbi.1008837.s003.pdf [file pcbi.1008837.s003.pdf]

# Pandemic velocity: forecasting COVID-19 in the U.S. with a machine learning & Bayesian time series compartmental model, supplemental material

Gregory L. Watson<sup>1</sup>, Di Xiong<sup>1</sup>, Lu Zhang<sup>1</sup>, Joseph A. Zoller<sup>1</sup>, John Shamshoian<sup>1</sup>, Phillip Sundin<sup>1</sup>, Teresa Bufford<sup>1</sup>, Anne W. Rimoin<sup>2</sup>, Marc A. Suchard<sup>1,3</sup>, Christina M. Ramirez<sup>1</sup>

**1** Department of Biostatistics, Fielding School of Public Health, University of California, Los Angeles, California, United States of America

**2** Department of Epidemiology, Fielding School of Public Health, University of California, Los Angeles, California, United States of America

**3** Departments of Computational Medicine and Human Genetics, David Geffen School of Medicine, University of California, Los Angeles, California, United States of America

**Table S1. Parameter Values & Distributions**

| Model          | Parameter       | Value/Distribution    |
|----------------|-----------------|-----------------------|
| SIRD           | $\rho^{-1}$     | $N(10, 1)$            |
| Velocity Model | $\mu_\mu$       | $N(0, 0.1)$           |
| Velocity Model | $\mu_\phi$      | $U(0, 1)$             |
| Velocity Model | $\mu_\tau$      | $Gamma(0.001, 0.001)$ |
| Velocity Model | $\sigma_\mu^2$  | 0.01                  |
| Velocity Model | $\sigma_\phi^2$ | 0.05                  |
| Velocity Model | $\sigma_\tau^2$ | 1                     |
| Velocity Model | <b>n.iter</b>   | 500,000               |
| Velocity Model | <b>n.burnin</b> | 10,000                |
| Velocity Model | <b>n.thin</b>   | 1500                  |
| Random Forest  | <b>ntree</b>    | 500                   |
| Random Forest  | <b>mtry</b>     | 9                     |
| Random Forest  | <b>nodesize</b> | 5                     |

Values and prior distributions for the parameters of each component of the model. The  $\rho$  parameter governs flow out of the I compartment of the SIRD model. Its inverse,  $\rho^{-1}$ , is interpreted as the expected amount of time until an infected individual recovers or dies.
