# Supplementary material for: Pandemic velocity: Forecasting COVID-19 in the US with a machine learning & Bayesian time series compartmental model
Source: PubMed Central journal article supplement (PMC8031749; doi:10.1371/journal.pcbi.1008837), 2021-03-29
Supplement: pcbi.1008837.s004.pdf [file pcbi.1008837.s004.pdf]

# Pandemic velocity: forecasting COVID-19 in the U.S. with a machine learning & Bayesian time series compartmental model, supplemental material

Gregory L. Watson<sup>1</sup>, Di Xiong<sup>1</sup>, Lu Zhang<sup>1</sup>, Joseph A. Zoller<sup>1</sup>, John Shamshoian<sup>1</sup>, Phillip Sundin<sup>1</sup>, Teresa Bufford<sup>1</sup>, Anne W. Rimoin<sup>2</sup>, Marc A. Suchard<sup>1,3</sup>, Christina M. Ramirez<sup>1</sup>

**1** Department of Biostatistics, Fielding School of Public Health, University of California, Los Angeles, California, United States of America

**2** Department of Epidemiology, Fielding School of Public Health, University of California, Los Angeles, California, United States of America

**3** Departments of Computational Medicine and Human Genetics, David Geffen School of Medicine, University of California, Los Angeles, California, United States of America

**Table S2. Death Model Comparison**

| Final Day of Training Data | Random Forest | AR-1  |
|----------------------------|---------------|-------|
| August 31, 2020            | 7.27          | 7.58  |
| September 30, 2020         | 8.31          | 7.22  |
| October 31, 2020           | 11.4          | 12.35 |
| November 30, 2020          | 18.19         | 21.06 |

The median state mean absolute error (MAE) for the random forest death model and a state-specific AR-1 model over the 21 days subsequent to the last day of the training data. The random forest death model performed better on 3 of the 4 evaluation periods. The greater MAE for later months is likely a result of the number of deaths increasing substantially over the course of the pandemic.
